# Supplementary material for: Exercise intensity-dependent effects of arm and leg-cycling on cognitive performance
Source: PubMed Central journal article supplement (PMC6802839; doi:10.1371/journal.pone.0224092), 2019-10-21
Supplement: pone.0224092.s001.pdf [file pone.0224092.s001.pdf]

| Reaction Time (ms)  |          |           |                     |          |           |
|---------------------|----------|-----------|---------------------|----------|-----------|
| Maximal leg cycling |          |           | Maximal arm cycling |          |           |
| Pre_CON             | Post_CON | Recov_CON | Pre_CON             | Post_CON | Recov_CON |
| 440.88              | 453.4    | 421.5     | 464.5               | 426.68   | 438.26    |
| 435.08              | 453      | 441.54    | 424.32              | 426.1    | 411.46    |
| 408.54              | 420      | 408.58    | 391.88              | 384.26   | 372.98    |
| 423.1               | 454.48   | 427.84    | 410.56              | 416.3    | 412.02    |
| 419.78              | 426.18   | 416.08    | 417.6               | 433.64   | 443.76    |
| 444.98              | 468      | 463.7     | 434.9               | 429.54   | 437.76    |
| 386.38              | 408.94   | 410.1     | 405.64              | 422      | 414.7     |
| 384.6               | 410.42   | 400.06    | 415.28              | 400.22   | 371.32    |
| 424.16              | 463.86   | 431.42    | 455.62              | 427.24   | 443.48    |
| 399.32              | 434      | 376.56    | 394.8               | 387.2    | 387       |
| 434.76              | 469      | 420.52    | 416.32              | 374.8    | 408.26    |
| 389.22              | 423.28   | 390.66    | 402.92              | 388.56   | 400.46    |
| 428.56              | 472.36   | 418.26    | 478.58              | 432.98   | 447.54    |

| Reaction Time (ms)  |            |             |                     |            |             |
|---------------------|------------|-------------|---------------------|------------|-------------|
| Maximal leg cycling |            |             | Maximal arm cycling |            |             |
| Pre_INCON           | Post_INCON | Recov_INCON | Pre_INCON           | Post_INCON | Recov_INCON |
| 440.88              | 453.4      | 421.5       | 464.5               | 426.68     | 438.26      |
| 435.08              | 453        | 441.54      | 424.32              | 426.1      | 411.46      |
| 408.54              | 420        | 408.58      | 391.88              | 384.26     | 372.98      |
| 423.1               | 454.48     | 427.84      | 410.56              | 416.3      | 412.02      |
| 419.78              | 426.18     | 416.08      | 417.6               | 433.64     | 443.76      |
| 444.98              | 468        | 463.7       | 434.9               | 429.54     | 437.76      |
| 386.38              | 408.94     | 410.1       | 405.64              | 422        | 414.7       |
| 384.6               | 410.42     | 400.06      | 415.28              | 400.22     | 371.32      |
| 424.16              | 463.86     | 431.42      | 455.62              | 427.24     | 443.48      |
| 399.32              | 434        | 376.56      | 394.8               | 387.2      | 387         |
| 434.76              | 469        | 420.52      | 416.32              | 374.8      | 408.26      |
| 389.22              | 423.28     | 390.66      | 402.92              | 388.56     | 400.46      |
| 428.56              | 472.36     | 418.26      | 478.58              | 432.98     | 447.54      |

| Response accuracy (%) |          |           |                     |          |           |
|-----------------------|----------|-----------|---------------------|----------|-----------|
| Maximal leg cycling   |          |           | Maximal arm cycling |          |           |
| Pre_CON               | Post_CON | Recov_CON | Pre_CON             | Post_CON | Recov_CON |
| 100                   | 100      | 100       | 100                 | 100      | 100       |
| 98                    | 100      | 96        | 100                 | 96       | 100       |
| 100                   | 100      | 100       | 100                 | 100      | 100       |
| 100                   | 100      | 100       | 100                 | 100      | 100       |
| 100                   | 96       | 96        | 100                 | 100      | 100       |
| 98                    | 100      | 100       | 100                 | 100      | 100       |
| 98                    | 98       | 100       | 100                 | 98       | 100       |
| 98                    | 100      | 96        | 98                  | 98       | 96        |
| 100                   | 100      | 98        | 98                  | 100      | 100       |
| 100                   | 100      | 96        | 100                 | 98       | 98        |
| 100                   | 98       | 98        | 100                 | 100      | 100       |
| 100                   | 100      | 100       | 100                 | 100      | 100       |
| 98                    | 98       | 100       | 100                 | 98       | 98        |

| Response accuracy (%) |            |             |                     |            |             |
|-----------------------|------------|-------------|---------------------|------------|-------------|
| Maximal leg cycling   |            |             | Maximal arm cycling |            |             |
| Pre_INCON             | Post_INCON | Recov_INCON | Pre_INCON           | Post_INCON | Recov_INCON |
| 98                    | 94         | 98          | 94                  | 94         | 100         |
| 88                    | 92         | 90          | 90                  | 96         | 94          |
| 94                    | 98         | 94          | 98                  | 92         | 92          |
| 98                    | 92         | 96          | 92                  | 96         | 98          |
| 88                    | 88         | 88          | 90                  | 88         | 100         |
| 96                    | 90         | 94          | 88                  | 90         | 92          |
| 90                    | 90         | 94          | 96                  | 96         | 98          |
| 88                    | 90         | 92          | 88                  | 86         | 88          |
| 98                    | 96         | 100         | 96                  | 92         | 98          |
| 100                   | 94         | 94          | 100                 | 96         | 96          |
| 94                    | 90         | 88          | 92                  | 90         | 86          |
| 96                    | 94         | 98          | 94                  | 96         | 92          |
| 92                    | 96         | 96          | 92                  | 92         | 100         |

| Reaction Time (ms)   |          |           |                      |          |           |                      |          |           |
|----------------------|----------|-----------|----------------------|----------|-----------|----------------------|----------|-----------|
| Relative leg cycling |          |           | Relative arm cycling |          |           | Absolute leg cycling |          |           |
| Pre_CON              | Post_CON | Recov_CON | Pre_CON              | Post_CON | Recov_CON | Pre_CON              | Post_CON | Recov_CON |
| 426.4                | 412.56   | 399.4     | 422.24               | 407      | 422.68    | 436.44               | 423.12   | 427.32    |
| 436.38               | 420      | 413.86    | 435.7                | 416.12   | 414       | 437.38               | 442.2    | 444.94    |
| 390.52               | 396.32   | 382.98    | 399.28               | 386      | 403       | 381.54               | 388.08   | 396.24    |
| 402.78               | 404.98   | 413.24    | 423.58               | 402.32   | 416.2     | 439.98               | 429.54   | 422.54    |
| 425.38               | 406.76   | 406.94    | 402.24               | 390      | 397.6     | 439.5                | 429      | 420.34    |
| 424.04               | 403      | 434.52    | 479.56               | 447      | 455.5     | 426.42               | 464.94   | 451.84    |
| 410.92               | 396      | 428.94    | 443.4                | 423.84   | 404.7     | 415.34               | 417.24   | 444.54    |
| 421.36               | 377.02   | 421.99    | 402.86               | 347      | 340       | 395.14               | 394.02   | 375.62    |
| 463.66               | 444.66   | 438.96    | 472.28               | 442.28   | 424       | 462.88               | 457.72   | 444.3     |
| 377.62               | 361.54   | 392.08    | 397.26               | 379.28   | 373.04    | 373.56               | 373.25   | 371.14    |
| 429.32               | 414.38   | 414.38    | 427                  | 390.72   | 404.54    | 458.48               | 404.9    | 424.38    |
| 382.94               | 403.4    | 397.84    | 412.54               | 404.48   | 398.96    | 383.1                | 395.48   | 413.08    |
| 443                  | 408      | 416       | 454.26               | 452.8    | 448.48    | 441.5                | 439      | 443.64    |

| Reaction Time (ms)   |            |             |                      |            |             |                      |            |             |
|----------------------|------------|-------------|----------------------|------------|-------------|----------------------|------------|-------------|
| Relative leg cycling |            |             | Relative arm cycling |            |             | Absolute leg cycling |            |             |
| Pre_INCON            | Post_INCON | Recov_INCON | Pre_INCON            | Post_INCON | Recov_INCON | Pre_INCON            | Post_INCON | Recov_INCON |
| 452.22               | 421        | 447.08      | 467.8                | 454        | 485.58      | 451.18               | 468.08     | 479.14      |
| 483.5                | 476        | 463.8       | 484.64               | 442.18     | 460.64      | 471.4                | 488.36     | 492.84      |
| 428.04               | 401        | 422.18      | 447.52               | 402.02     | 454.5       | 439.62               | 435        | 421.42      |
| 455.64               | 425        | 468.28      | 473.02               | 422        | 459.9       | 503.52               | 483.84     | 491.48      |
| 459.3                | 445.8      | 457.26      | 443.38               | 447.2      | 432.78      | 485.7                | 484        | 473.76      |
| 502.96               | 466.2      | 490.76      | 529.54               | 501.44     | 517.82      | 499.68               | 514.36     | 501.38      |
| 443.88               | 436        | 467.5       | 520.22               | 457.04     | 446.82      | 479.84               | 491.64     | 484.32      |
| 459.44               | 414.24     | 422.28      | 409                  | 396        | 425.02      | 421.22               | 412.92     | 413.68      |
| 505.92               | 471.9      | 486.96      | 501.46               | 483.8      | 498.8       | 536.16               | 497.6      | 510.88      |
| 394.16               | 361.32     | 404.38      | 409.54               | 388.12     | 383.14      | 408.1                | 385.22     | 406         |
| 533.54               | 467.54     | 467.54      | 483.32               | 463        | 443.6       | 478.16               | 452.2      | 451.24      |
| 423.06               | 424        | 437         | 449.24               | 426        | 445.92      | 403.8                | 420.54     | 430.82      |
| 513.5                | 484        | 488         | 549.38               | 527        | 531.56      | 575.78               | 570        | 575         |

| Response accuracy (%) |          |           |                      |          |           |                      |          |           |
|-----------------------|----------|-----------|----------------------|----------|-----------|----------------------|----------|-----------|
| Relative leg cycling  |          |           | Relative arm cycling |          |           | Absolute leg cycling |          |           |
| Pre_CON               | Post_CON | Recov_CON | Pre_CON              | Post_CON | Recov_CON | Pre_CON              | Post_CON | Recov_CON |
| 99                    | 98       | 98        | 98                   | 98       | 99        | 98                   | 99       | 99        |
| 97                    | 98       | 98        | 98                   | 98       | 99        | 98                   | 99       | 99        |
| 99                    | 98       | 98        | 98                   | 98       | 99        | 98                   | 99       | 99        |
| 98                    | 98       | 98        | 98                   | 98       | 99        | 98                   | 98       | 99        |
| 98                    | 98       | 97        | 98                   | 98       | 99        | 98                   | 98       | 98        |
| 98                    | 98       | 99        | 98                   | 97       | 98        | 98                   | 98       | 98        |
| 98                    | 98       | 99        | 98                   | 97       | 98        | 97                   | 98       | 98        |
| 98                    | 98       | 98        | 98                   | 97       | 98        | 97                   | 98       | 98        |
| 98                    | 98       | 97        | 98                   | 97       | 98        | 99                   | 99       | 98        |
| 98                    | 98       | 98        | 98                   | 97       | 97        | 98                   | 98       | 98        |
| 99                    | 97       | 99        | 99                   | 97       | 97        | 98                   | 98       | 98        |
| 99                    | 97       | 97        | 99                   | 96       | 99        | 98                   | 98       | 97        |
| 98                    | 96       | 96        | 98                   | 96       | 99        | 98                   | 97       | 97        |

| Response accuracy (%) |            |             |                      |            |             |                      |            |             |
|-----------------------|------------|-------------|----------------------|------------|-------------|----------------------|------------|-------------|
| Relative leg cycling  |            |             | Relative arm cycling |            |             | Absolute leg cycling |            |             |
| Pre_INCON             | Post_INCON | Recov_INCON | Pre_INCON            | Post_INCON | Recov_INCON | Pre_INCON            | Post_INCON | Recov_INCON |
| 94                    | 98         | 96          | 98                   | 96         | 98          | 100                  | 94         | 96          |
| 94                    | 90         | 86          | 88                   | 88         | 90          | 98                   | 92         | 92          |
| 98                    | 96         | 94          | 94                   | 98         | 94          | 90                   | 92         | 96          |
| 98                    | 100        | 98          | 98                   | 96         | 96          | 98                   | 100        | 100         |
| 96                    | 88         | 92          | 88                   | 86         | 88          | 98                   | 96         | 96          |
| 100                   | 96         | 96          | 96                   | 94         | 94          | 98                   | 96         | 92          |
| 92                    | 94         | 88          | 90                   | 90         | 94          | 94                   | 100        | 94          |
| 76                    | 92         | 92          | 88                   | 90         | 92          | 90                   | 90         | 92          |
| 98                    | 98         | 98          | 98                   | 96         | 100         | 98                   | 94         | 98          |
| 100                   | 98         | 98          | 100                  | 94         | 94          | 96                   | 94         | 92          |
| 86                    | 92         | 92          | 94                   | 94         | 94          | 92                   | 92         | 96          |
| 100                   | 98         | 96          | 96                   | 94         | 98          | 96                   | 94         | 100         |
| 100                   | 100        | 100         | 92                   | 96         | 96          | 98                   | 96         | 100         |
